# Supplementary material for: Soft anatomy and morphological variation in Daptomys peruviensis (Rodentia, Cricetidae), a rare ichthyomyine from the northwestern Amazonian forests
Source: PeerJ. 2025 Mar 5;13:e18997. doi: 10.7717/peerj.18997 (PMC11890035; doi:10.7717/peerj.18997)
Supplement: Supplemental S1 — Daptomys peruviensis record localities used for modeling [file peerj-13-18997-s004.xlsx]

## Sheet: Records
Species	N° lacality	Country	Locality	Latitude	Longitude
Daptomys peruviensis peruviensis	1	Peru	Villa Carmen, Perú	12° 53' 13.2" S	071° 23' 35.88" W
Daptomys peruviensis peruviensis	2	Peru	Aguas Calientes	12° 40' 6.0" S	071° 16' 8.0" W
Daptomys peruviensis peruviensis	3	Peru	Pakitza	11° 57' 0.0" S	071° 16' 48.0" W
Daptomys peruviensis peruviensis	4	Peru	Rio Curanja	10° 08' 0.0" S	071° 13' 0.0" W
Daptomys peruviensis peruviensis	5	Peru	Río Shesha	08° 11' 49.56" S	073° 56' 45.96" W
Daptomys peruviensis musseri	6	Peru	Loreto	03° 52' 12.0" S	073° 23' 49.92" W
Daptomys peruviensis musseri	7	Ecuador	Cordillera del Cóndor	03° 45' 25.78" S	078° 30' 3.80" W
Daptomys peruviensis musseri	8	Ecuador	Chalwayaku	01° 30' 37.87" S	078° 07' 21.0" W
Daptomys peruviensis musseri	9	Ecuador	Piatúa	01° 12' 18.32" S	077° 57' 10.22" W
Daptomys peruviensis musseri	10	Ecuador	Villano	01° 30' 21.6" S	077° 30' 35.28" W
Daptomys peruviensis musseri	11	Ecuador	Yasuní	00° 39' 15.0" S	076° 27' 0.6" W
Daptomys mussoi	12	Colombia	Vereda de San Carlos	07° 06' 6.12" N	072° 28' 42.96" W
Daptomys mussoi	13	Colombia	Vereda Rosa Blanca	07° 09' 21.24" N	072° 28' 42.96" W
Daptomys mussoi	14	Venezuela	Río Potosi	07° 57' 0.0" N	071° 39' 0.0" W
